# Supplementary figures and images for: High and asymmetric somato-dendritic coupling of V1 layer 5 neurons independent of visual stimulation and locomotion
Source: eLife journal article supplement (doi:10.7554/elife.49145), 2019-12-27

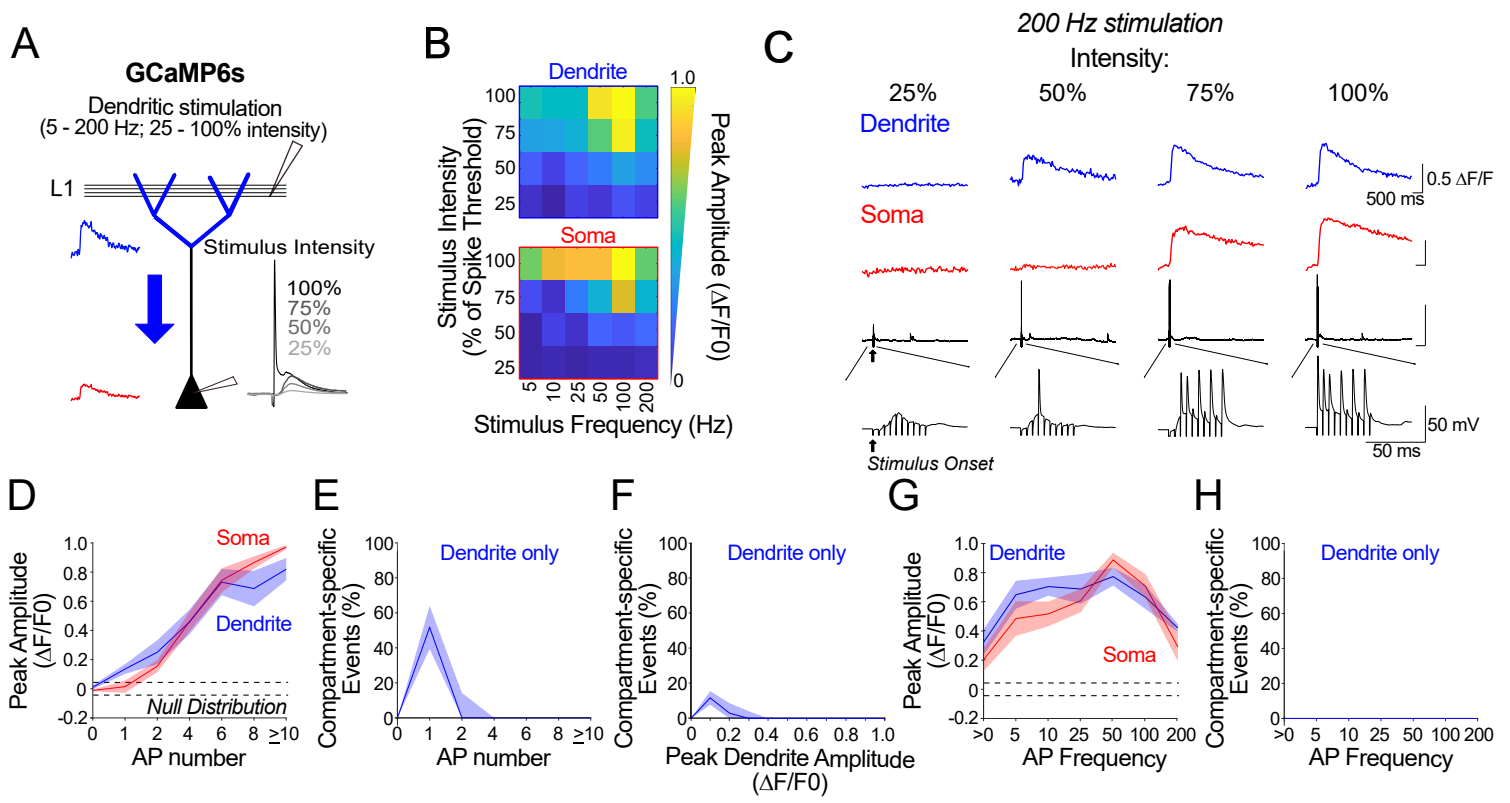

Supplement: supp [file elife-49145-supp-v1.zip]

Soma - Trunk

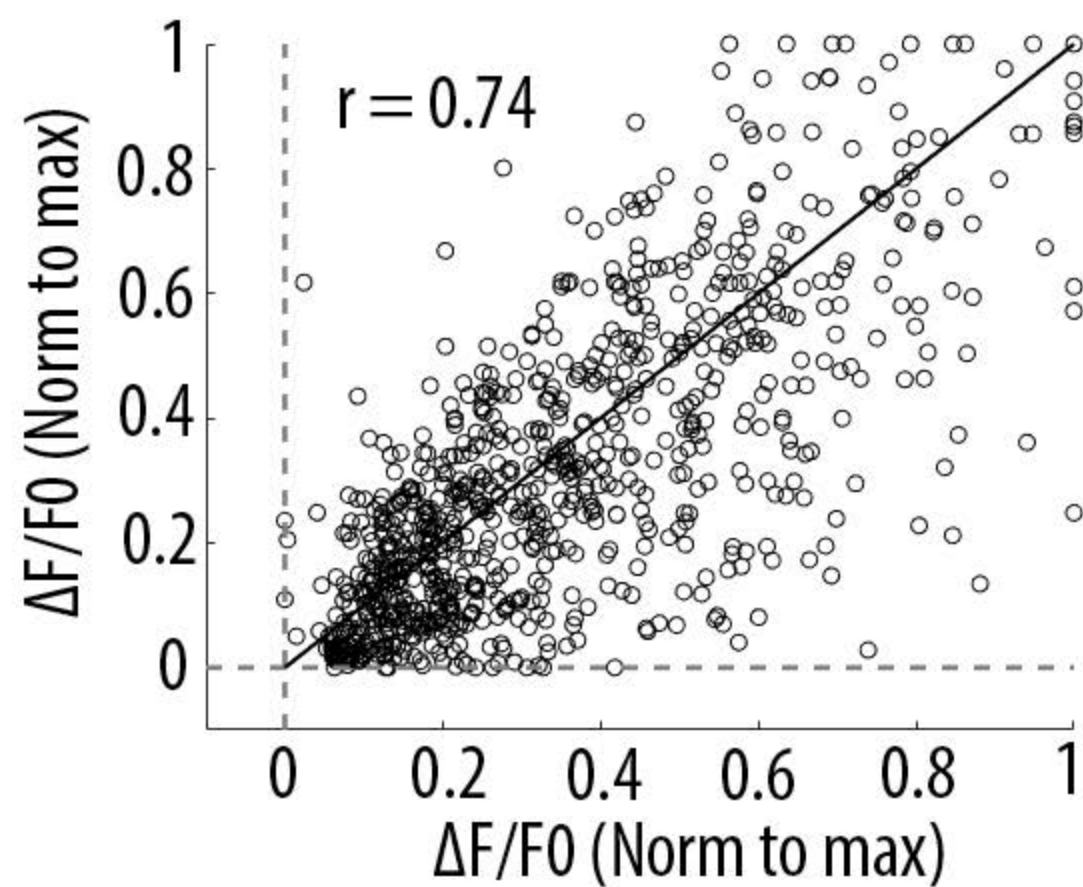

pTrunk - dTrunk

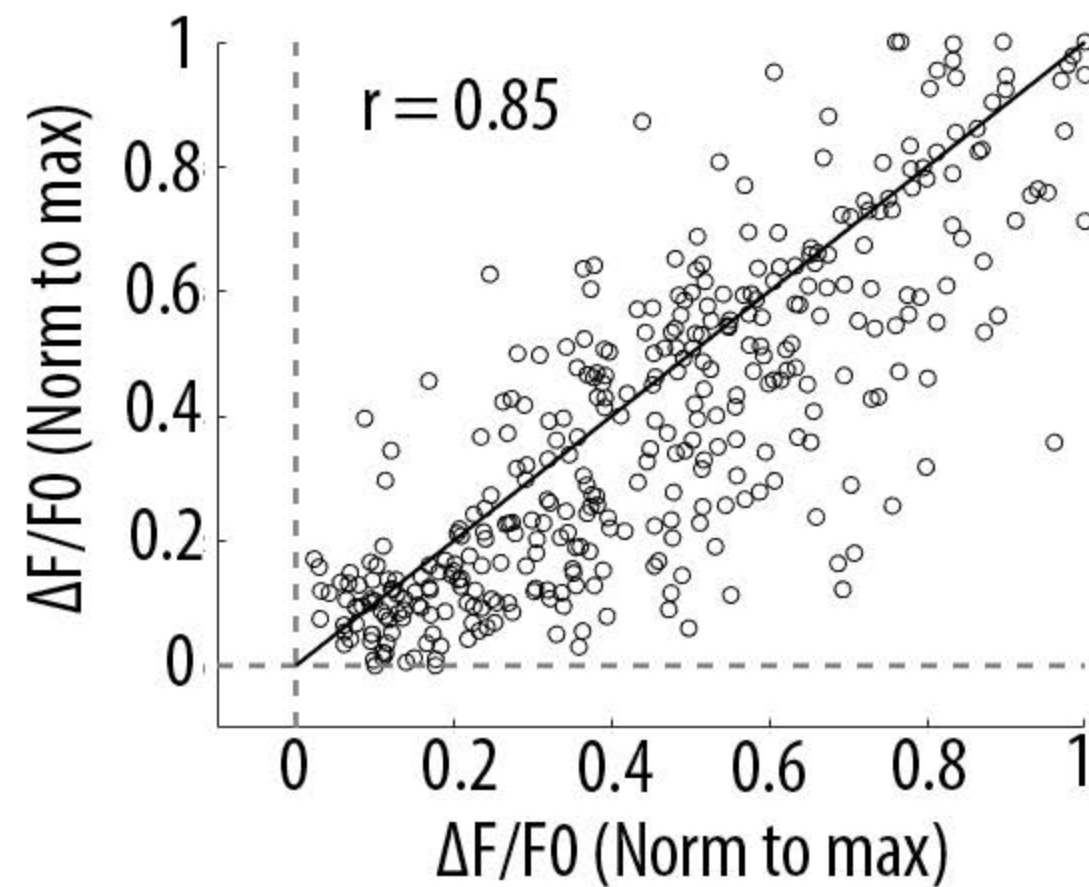

Trunk - Tuft

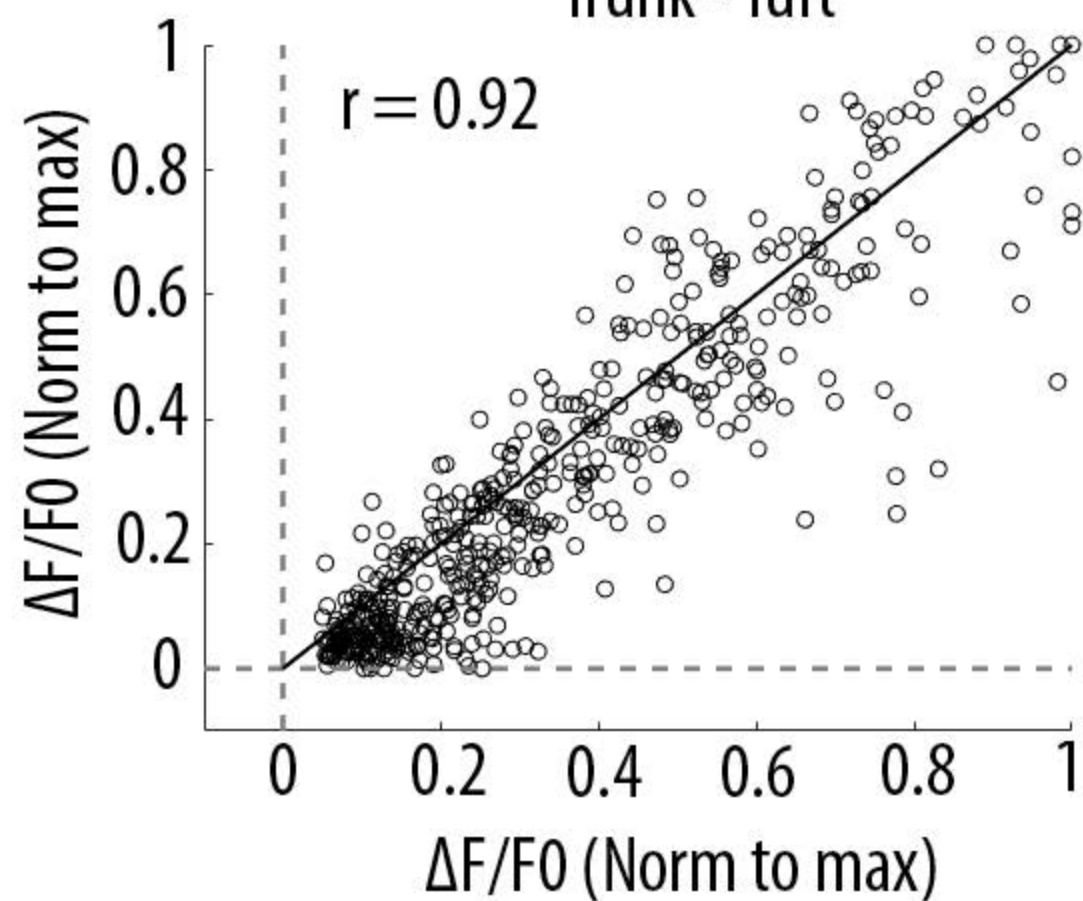

pTuft - dTuft

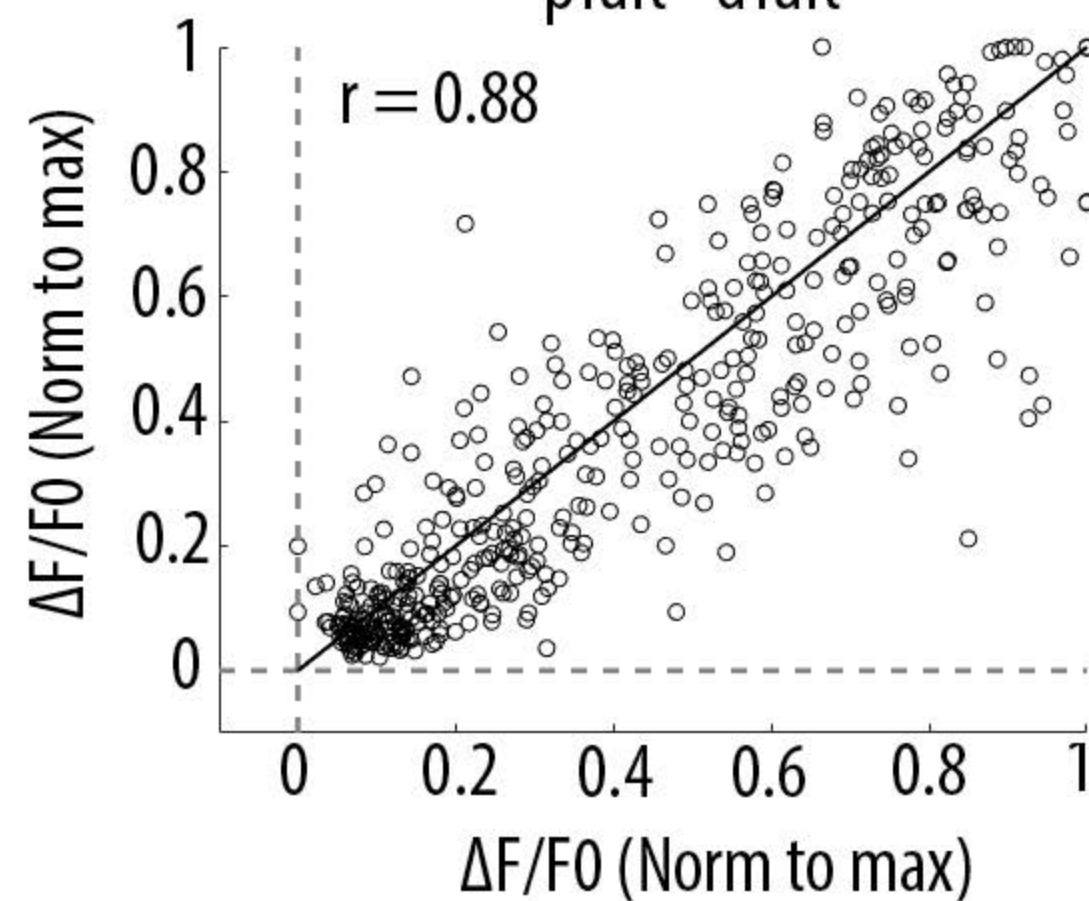

Supplement: supp [file elife-49145-supp-v1.zip]

**A**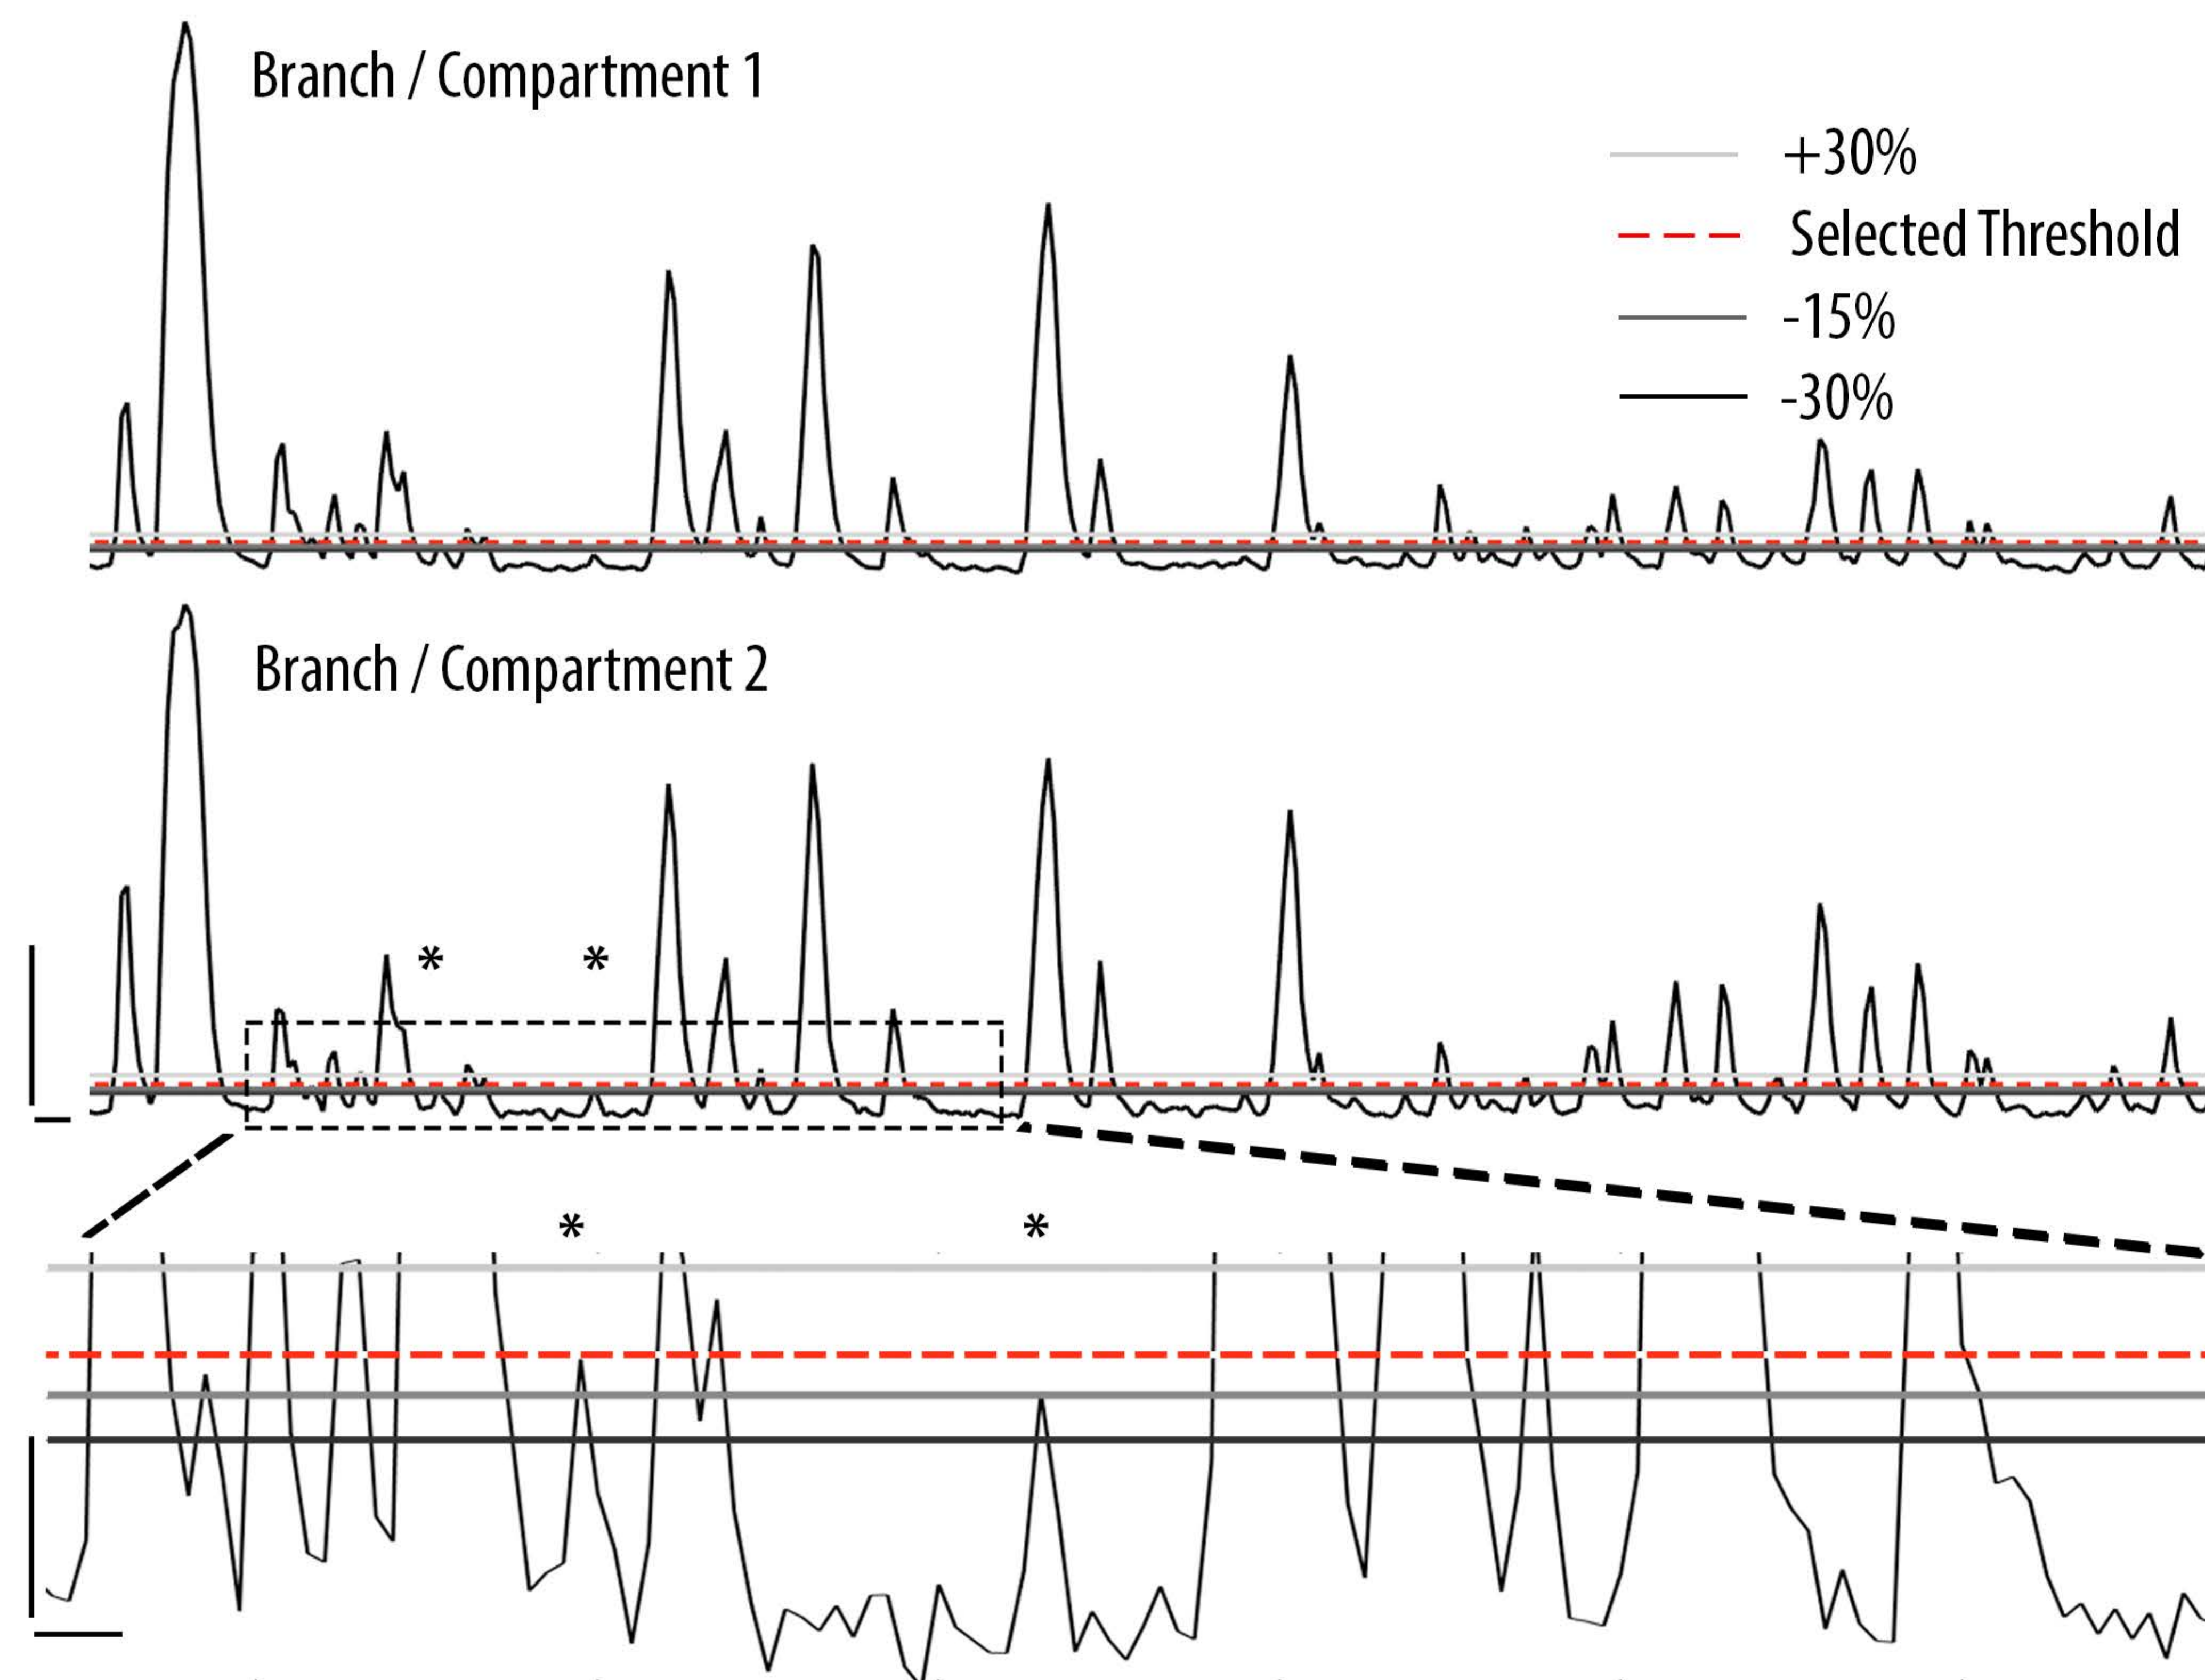**B**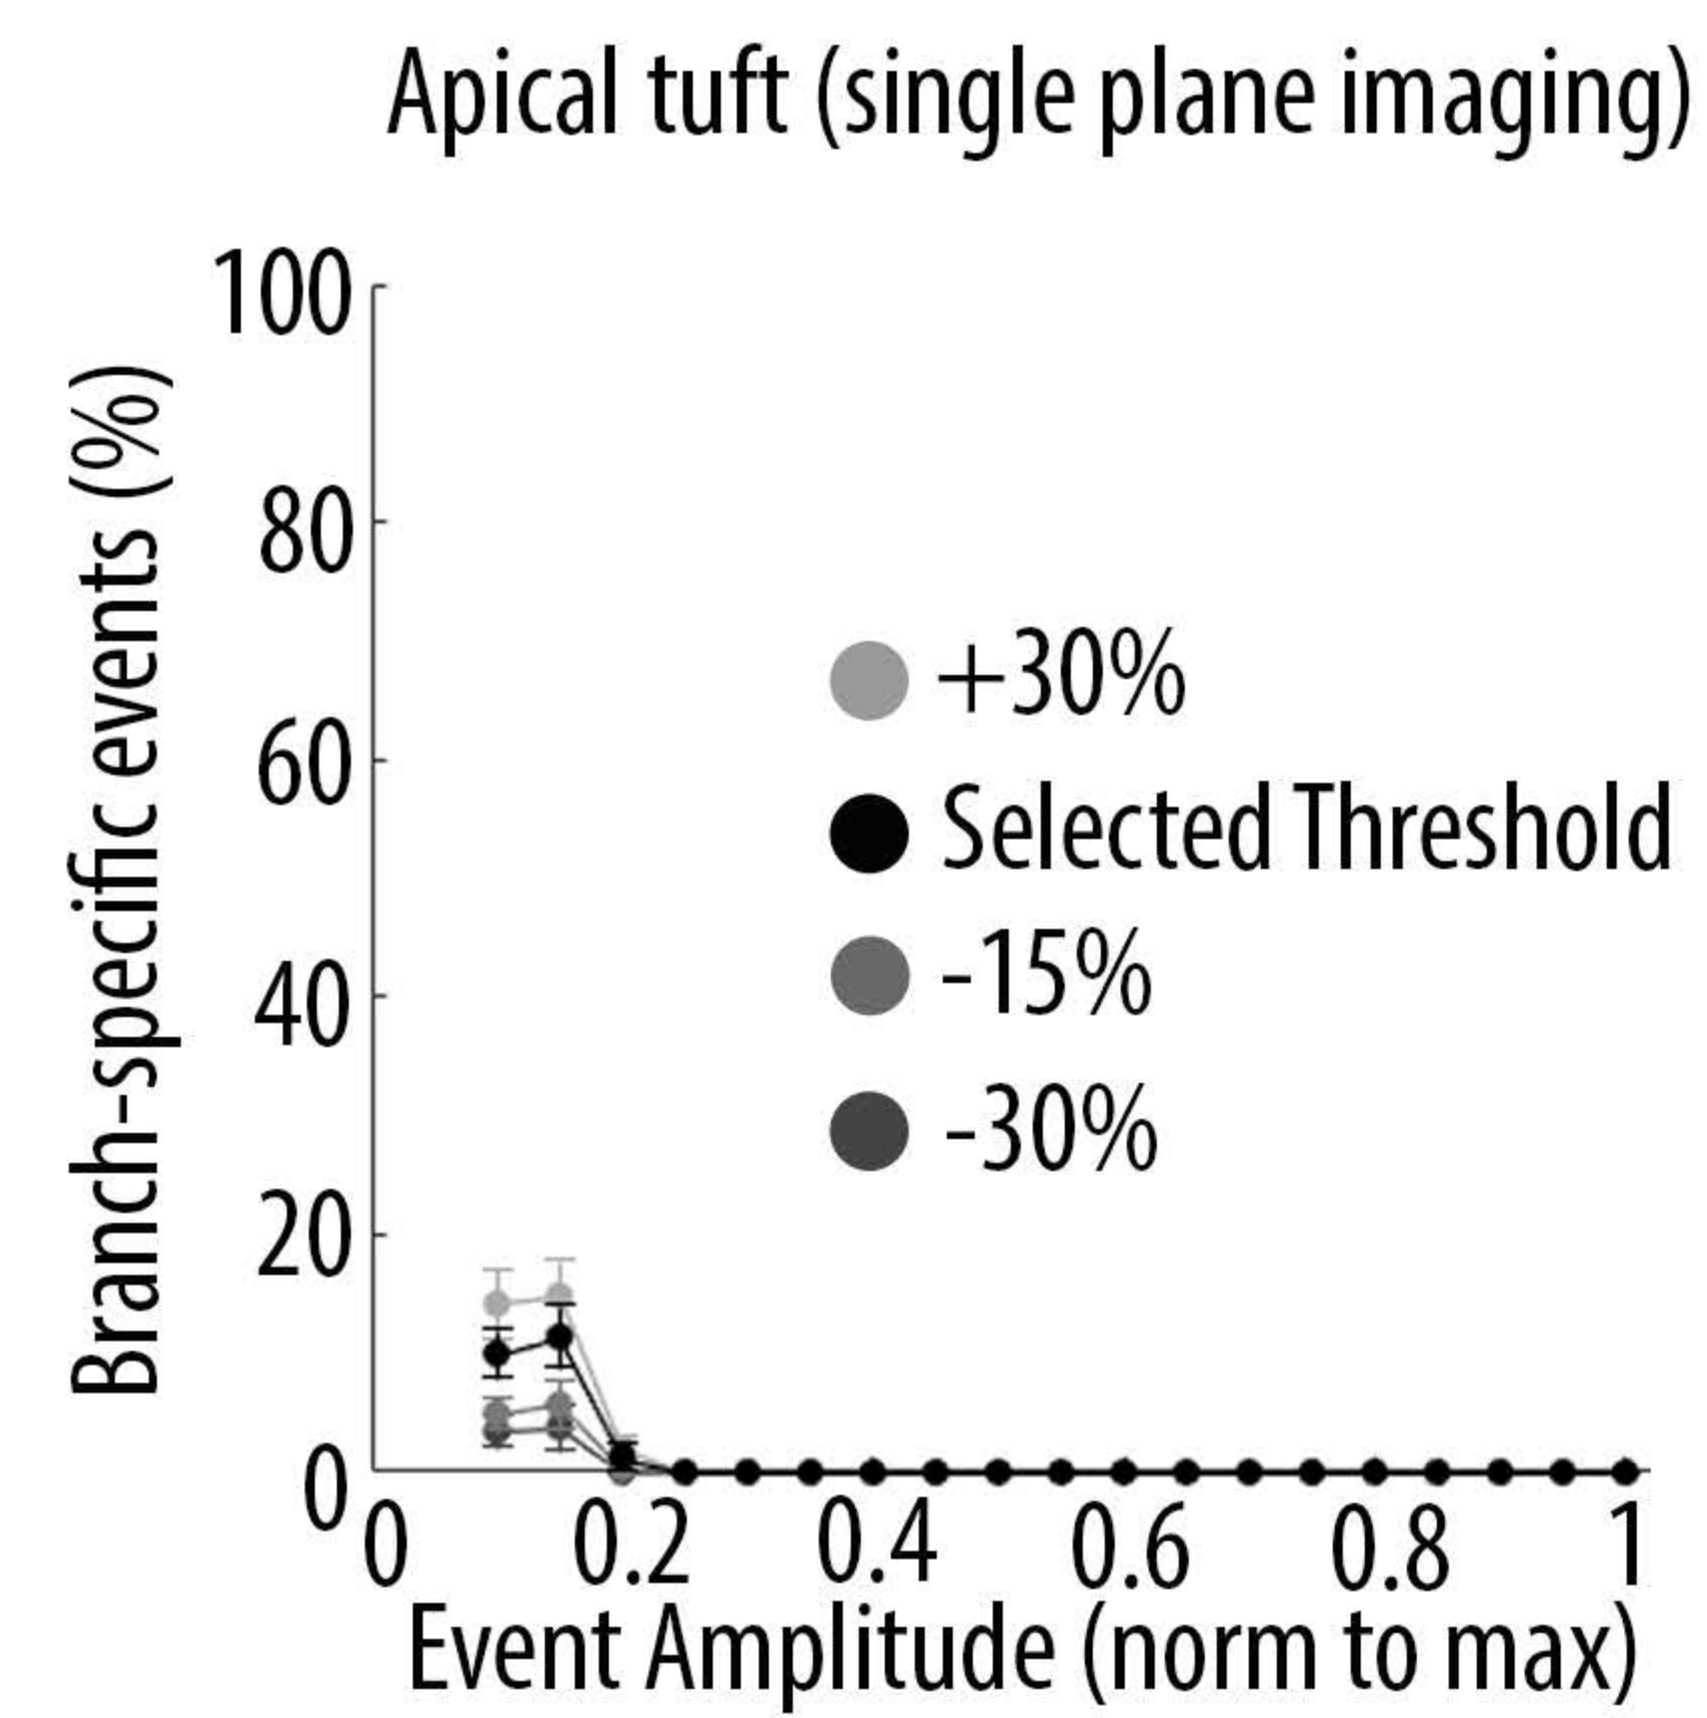**C**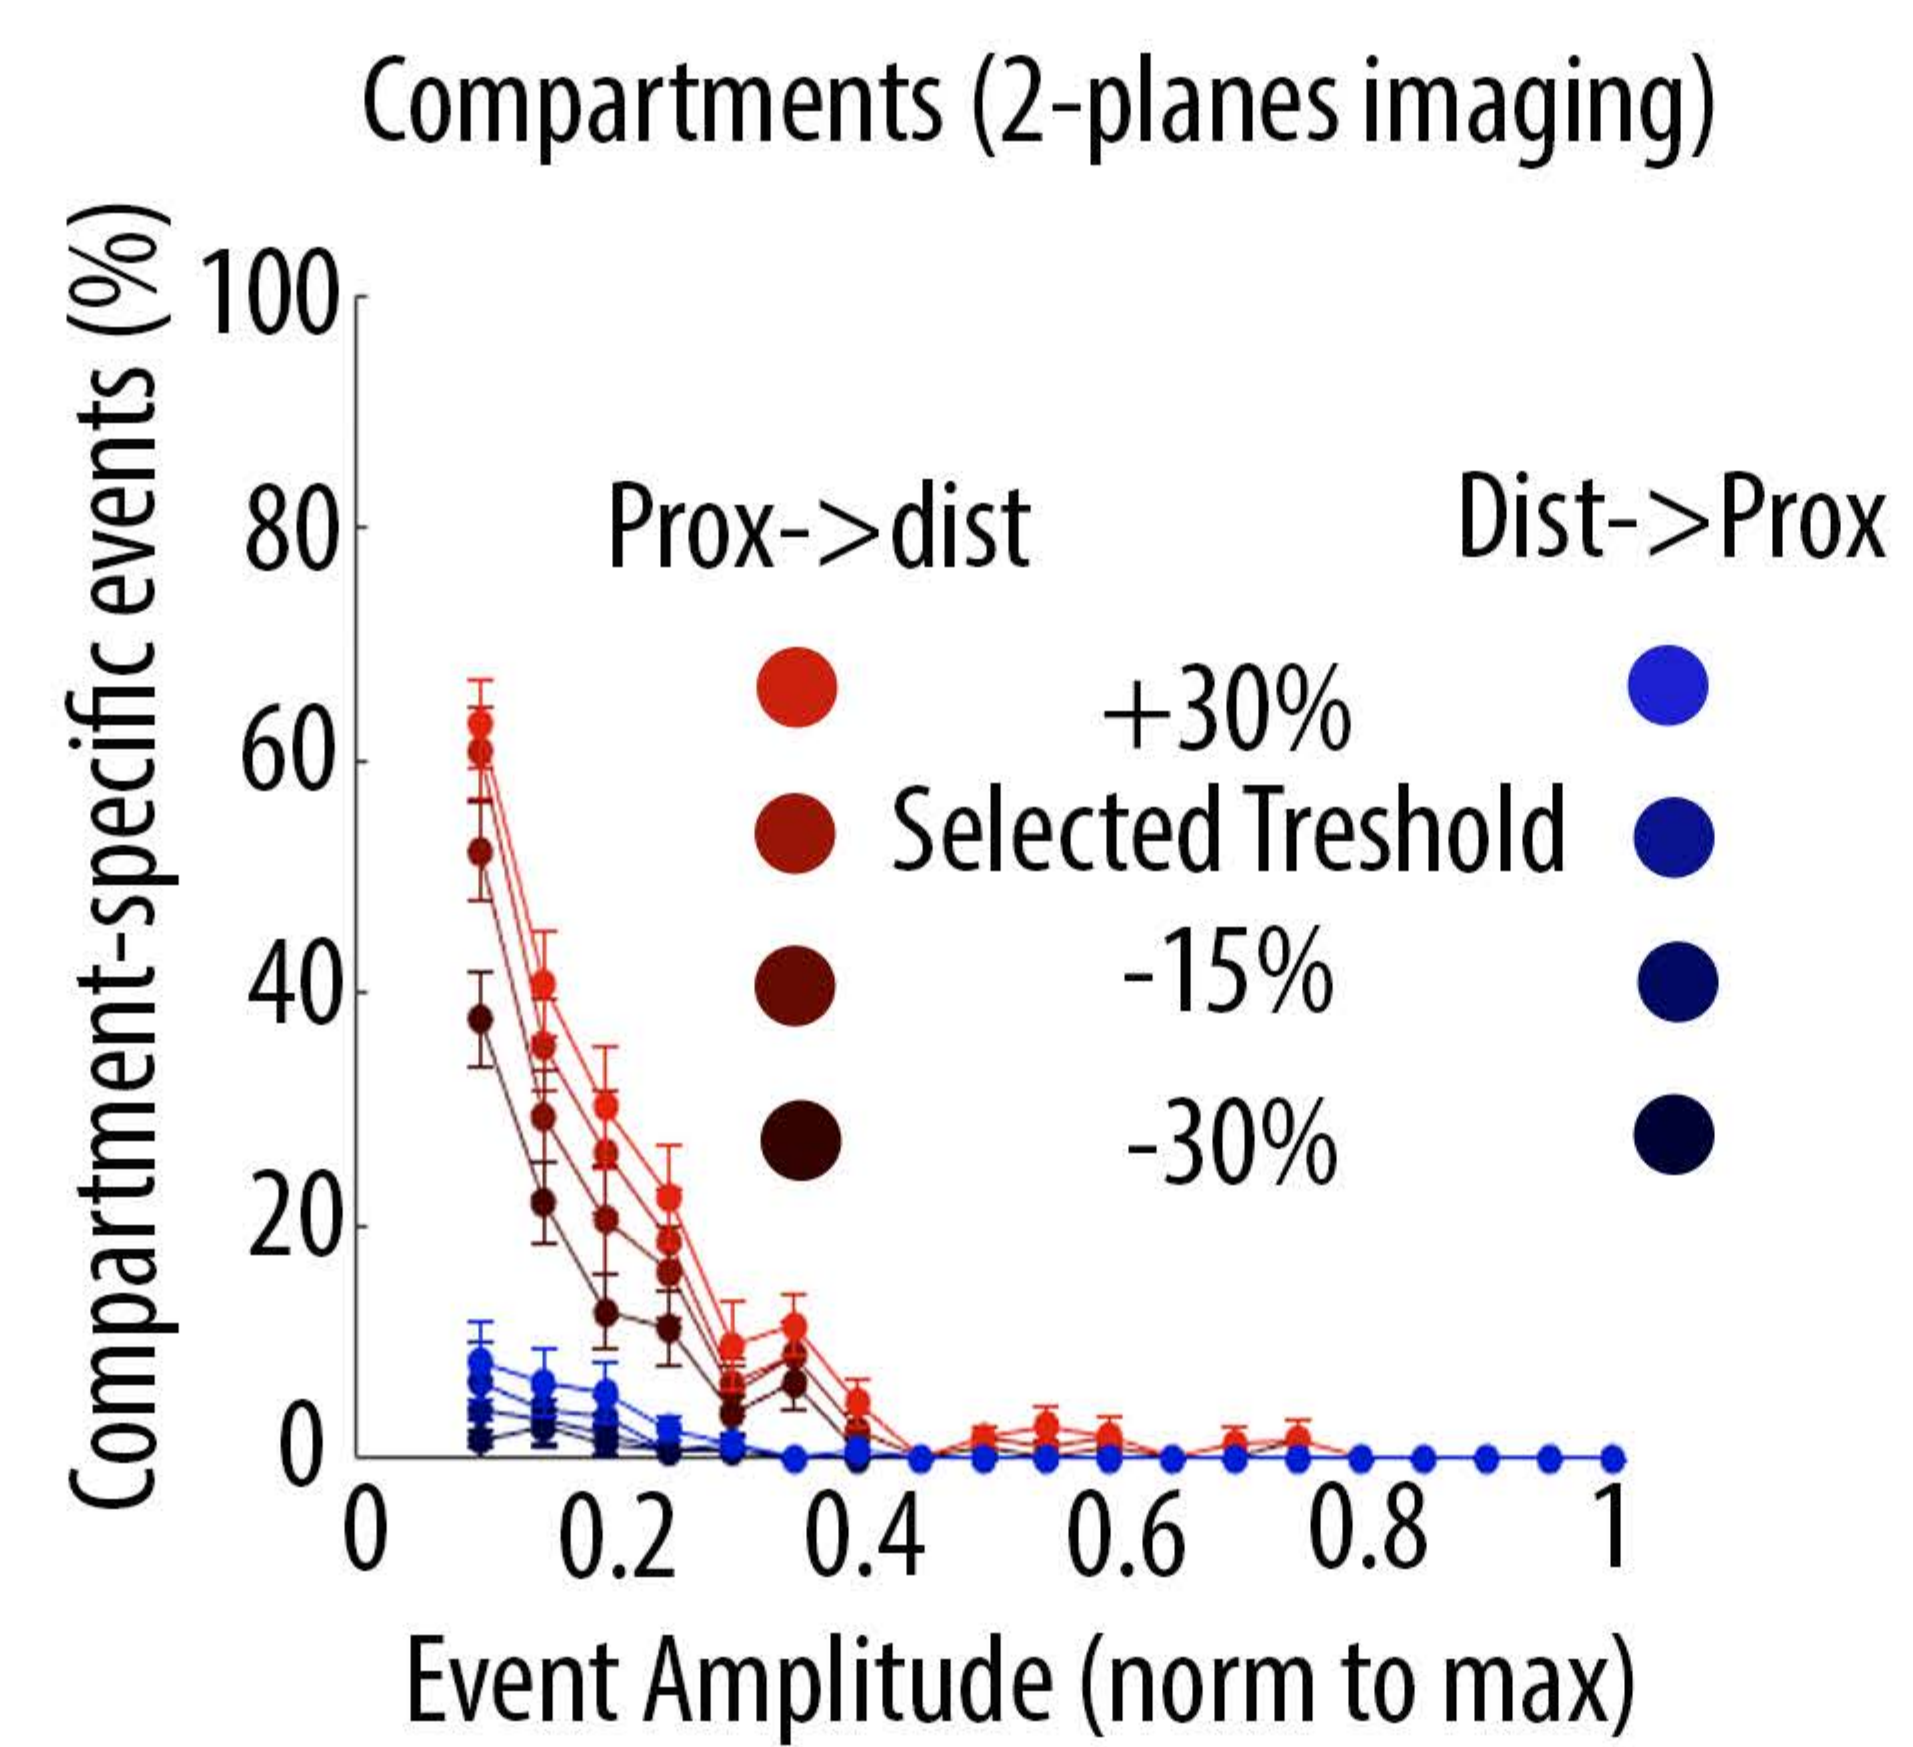**D**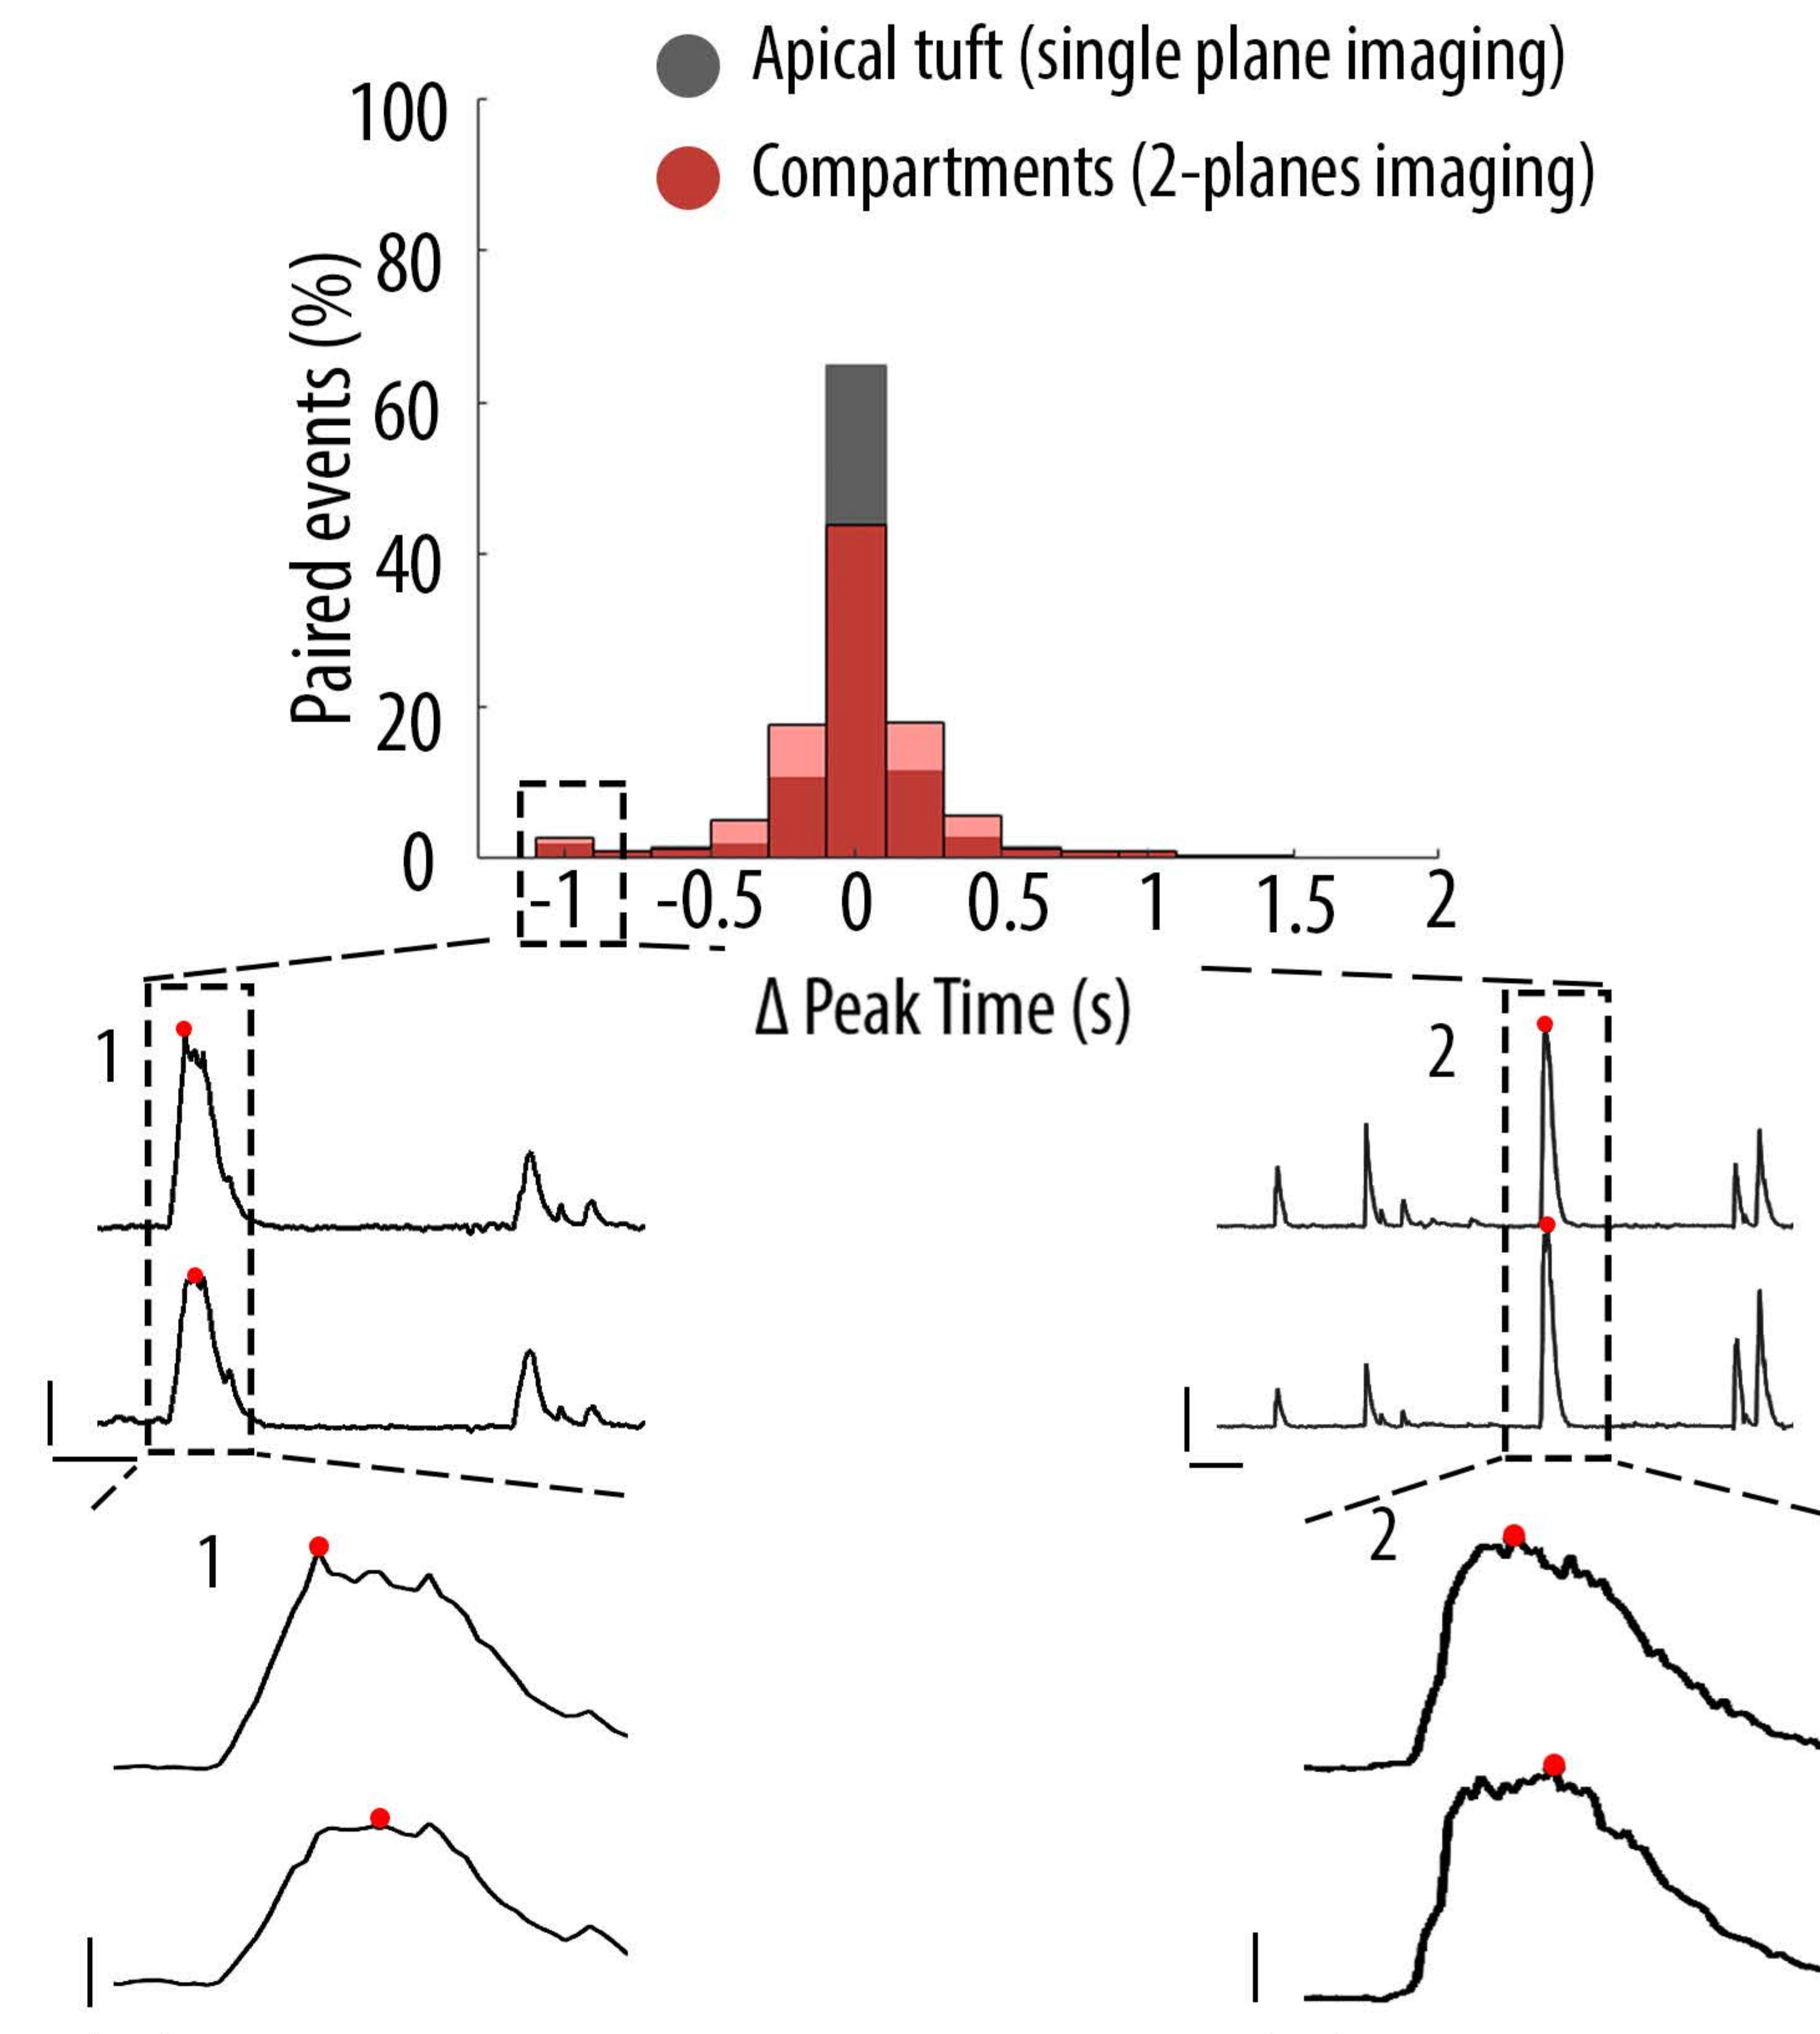**E**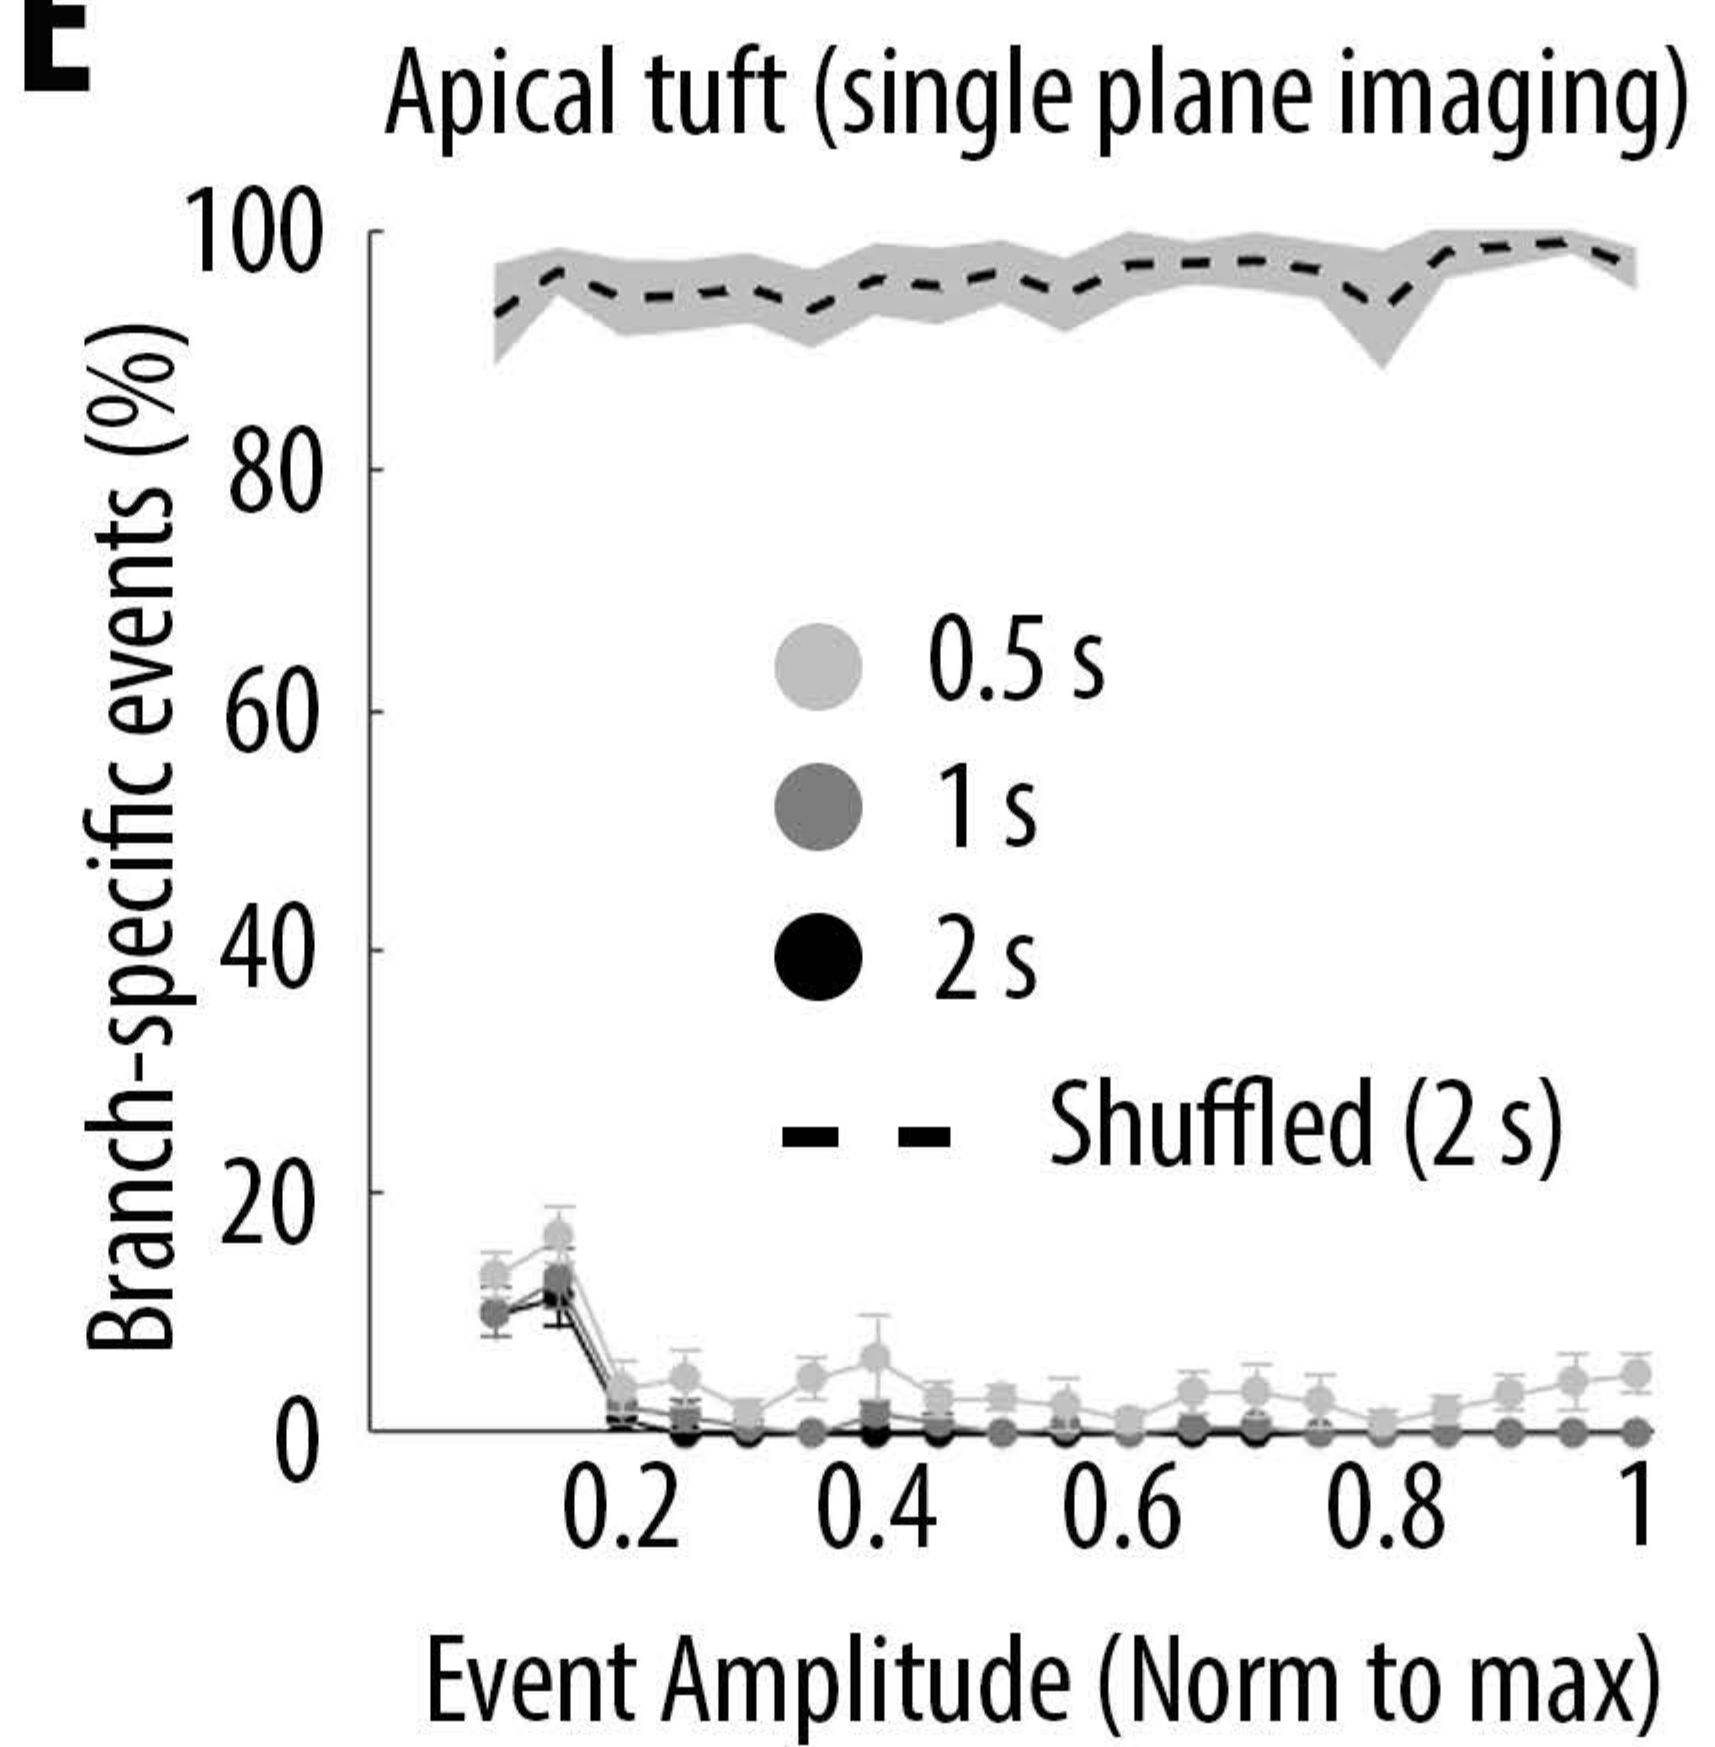**F**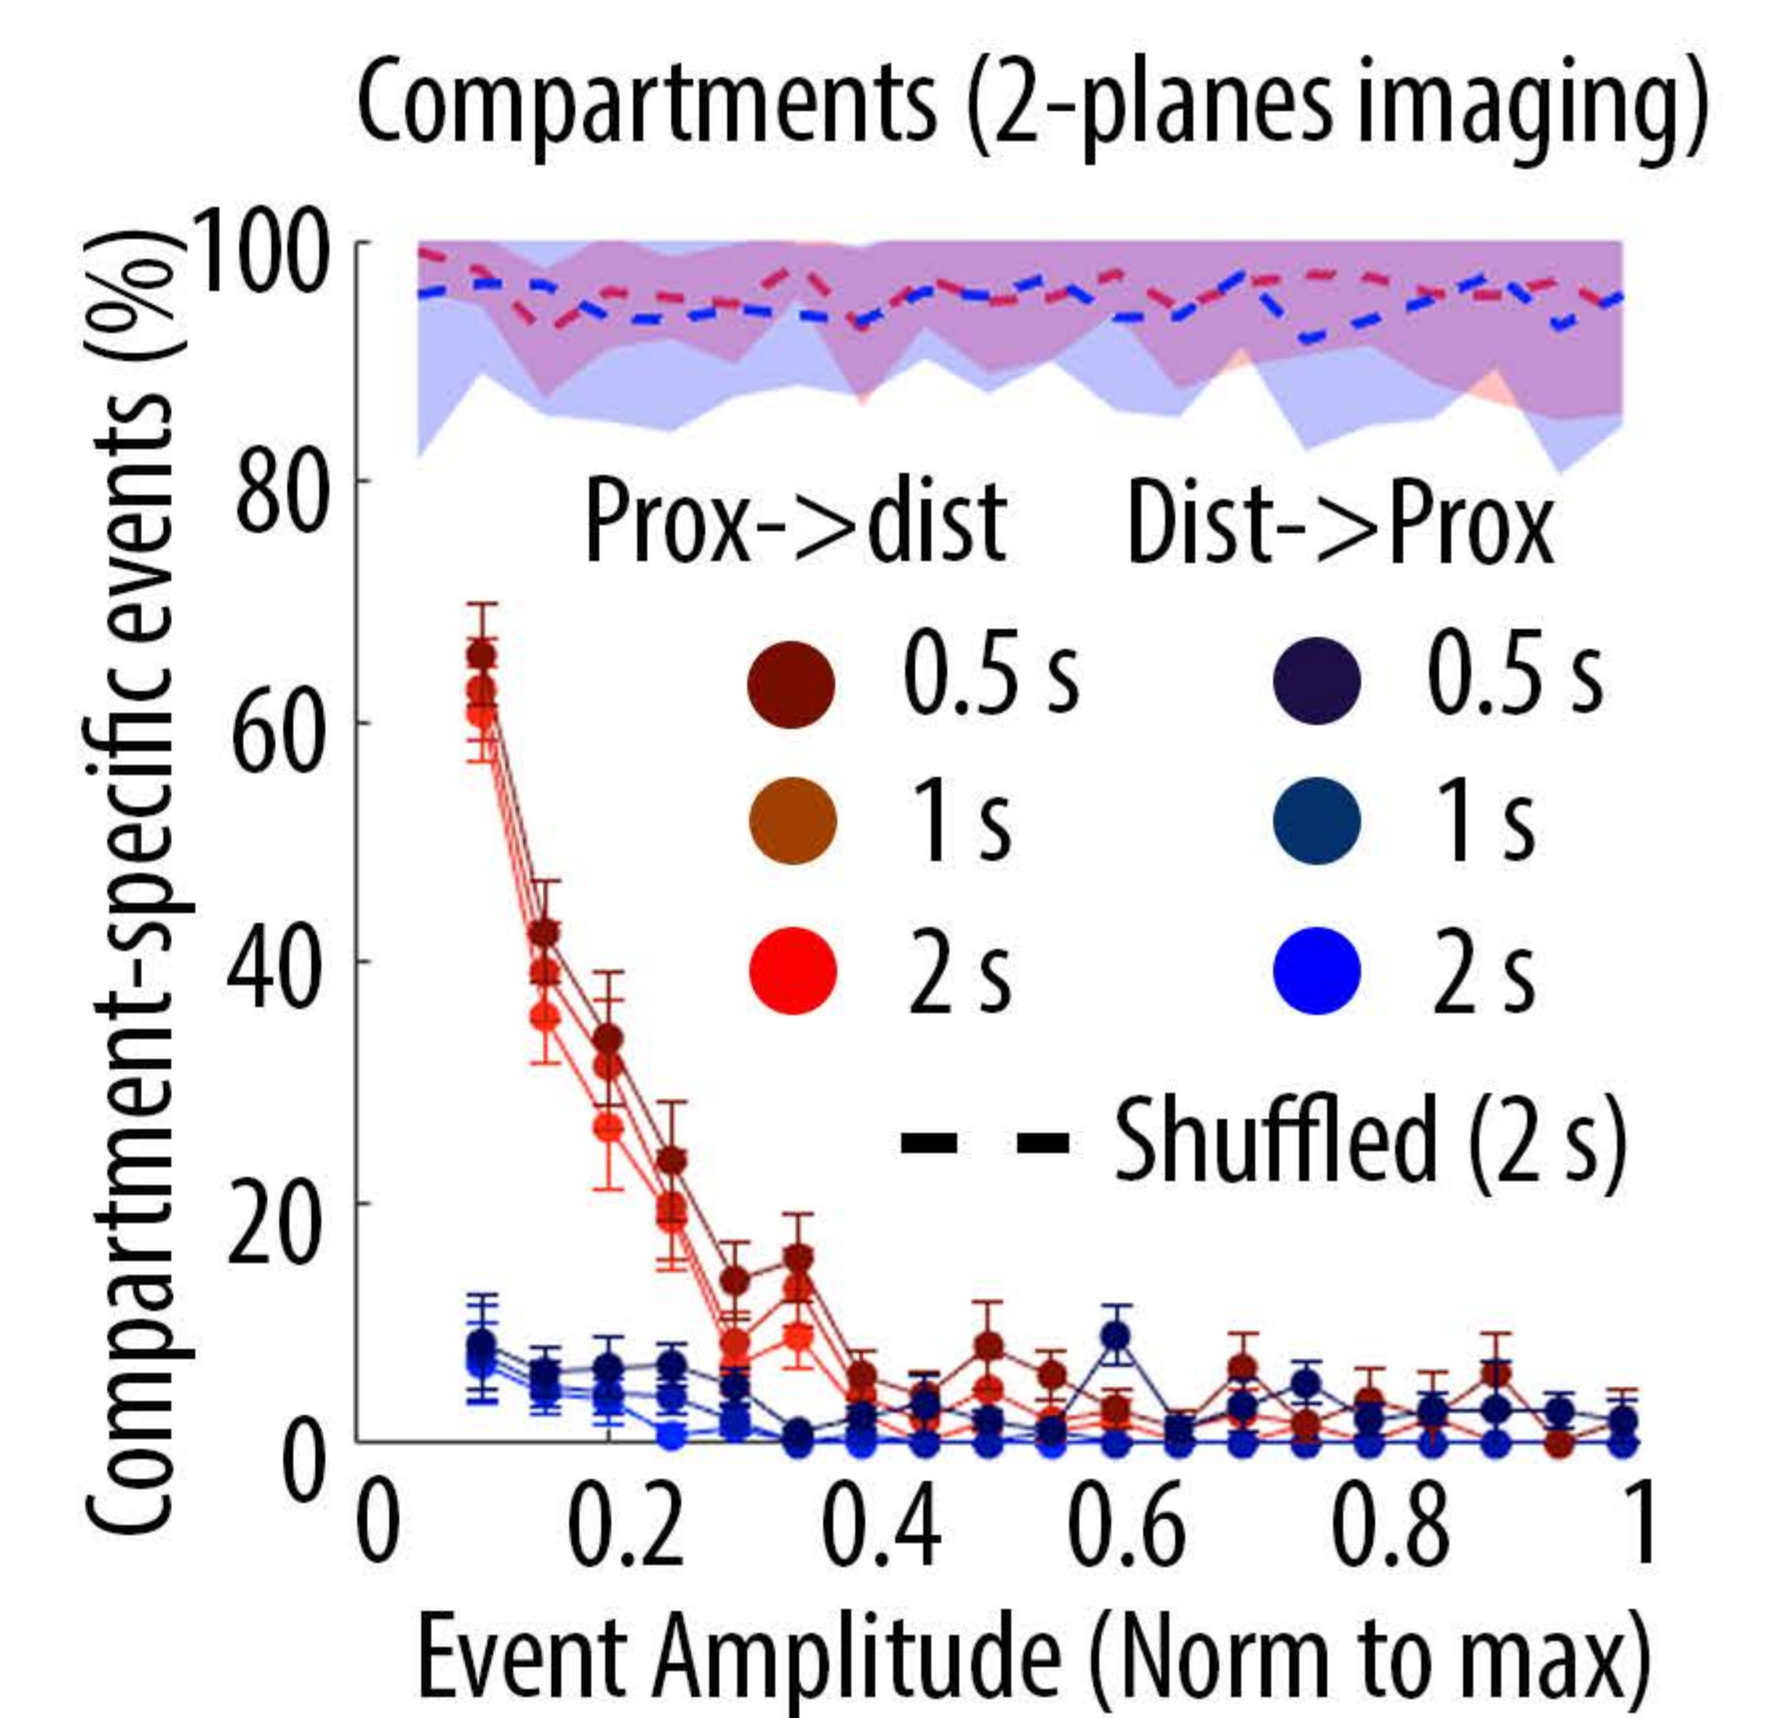

Supplement: supp [file elife-49145-supp-v1.zip]

**A**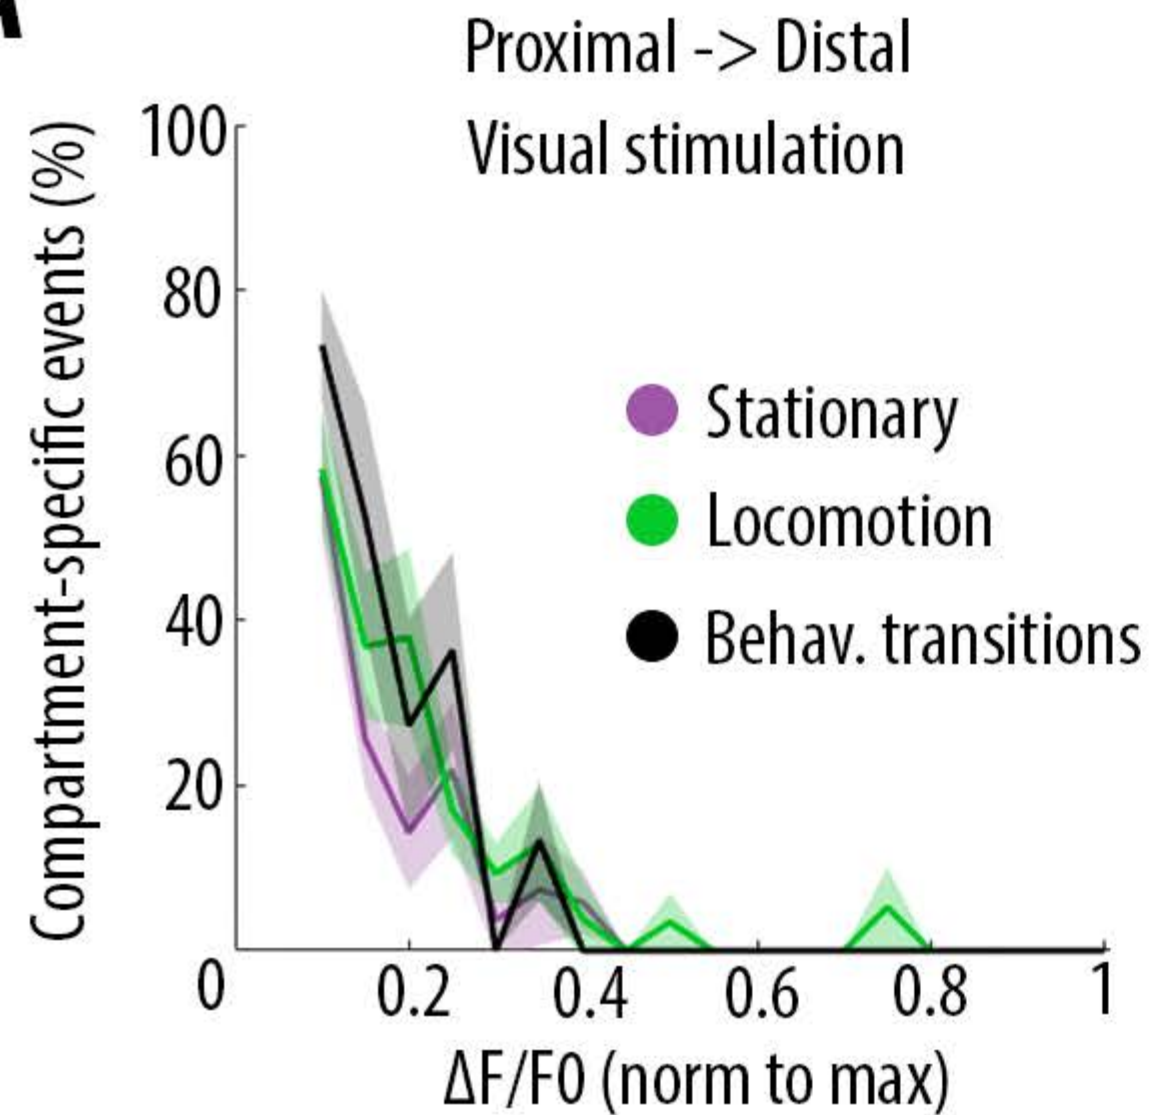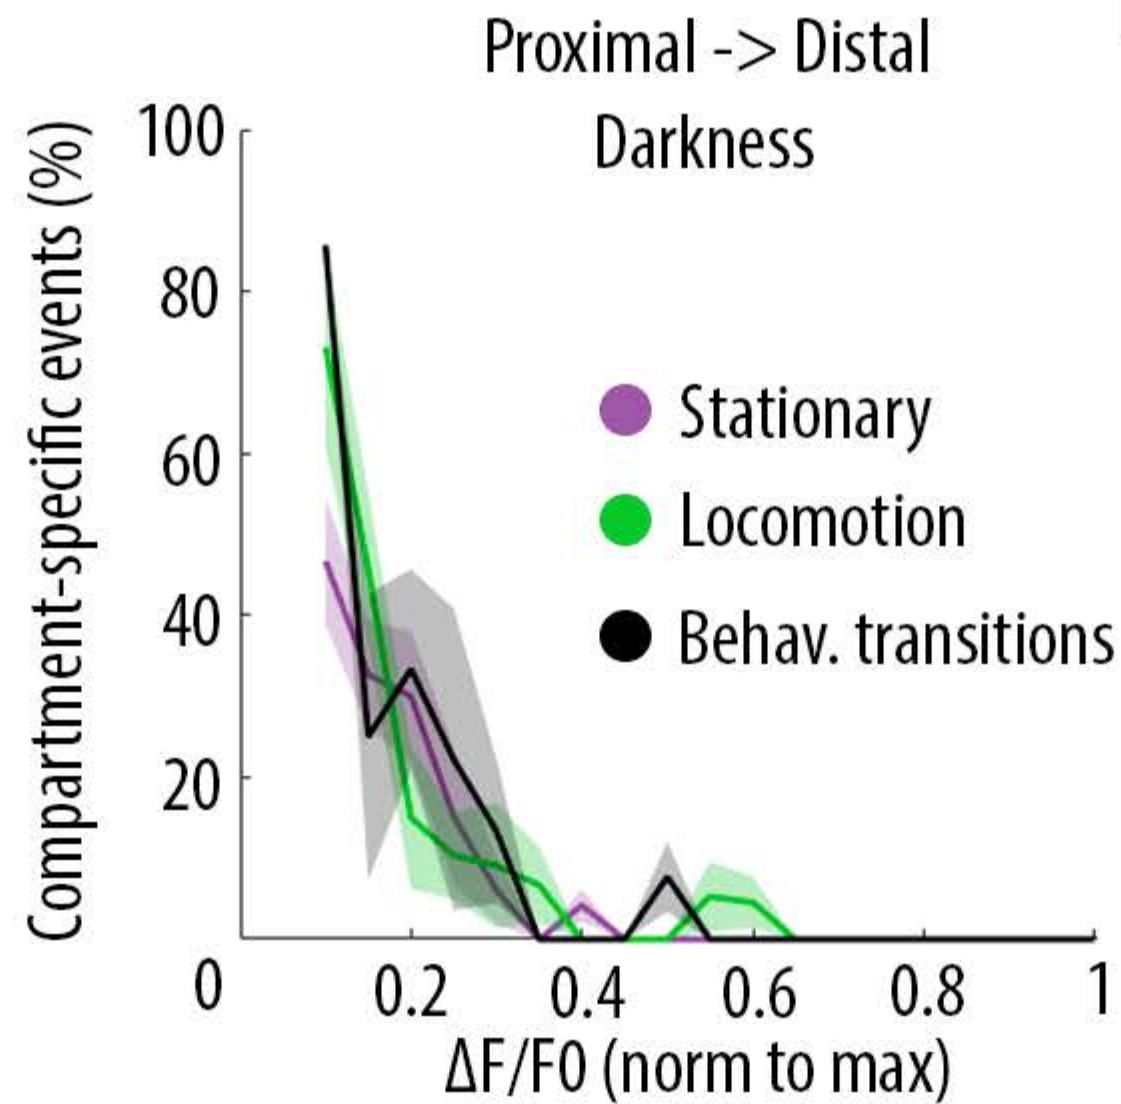**B**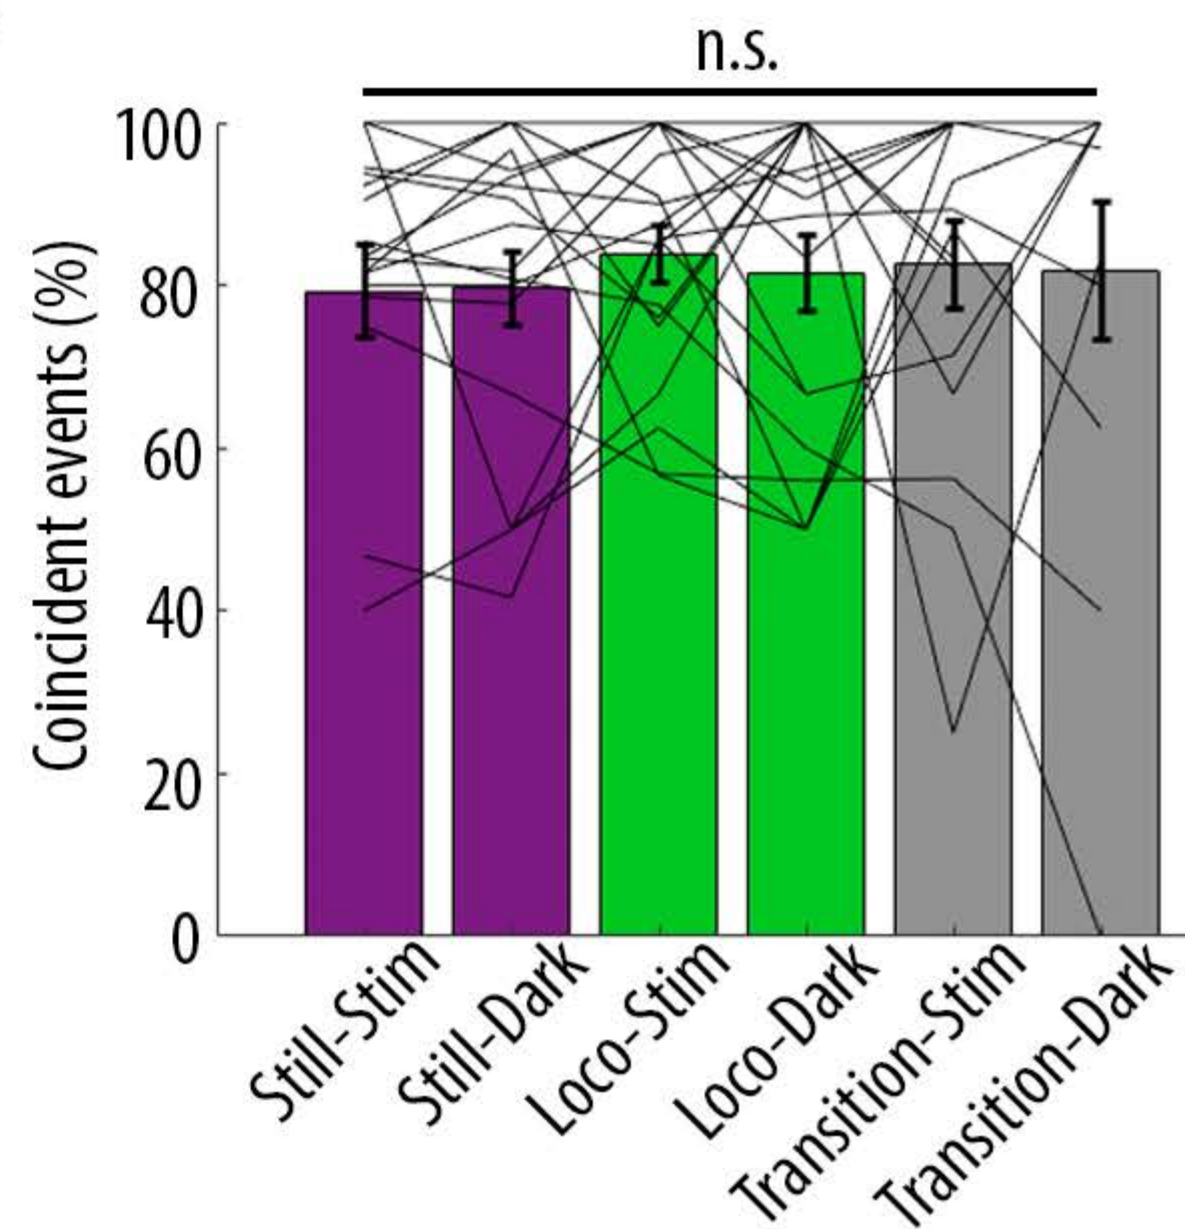

Supplement: supp [file elife-49145-supp-v1.zip]

**A**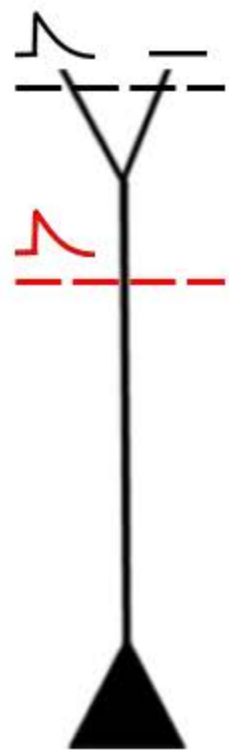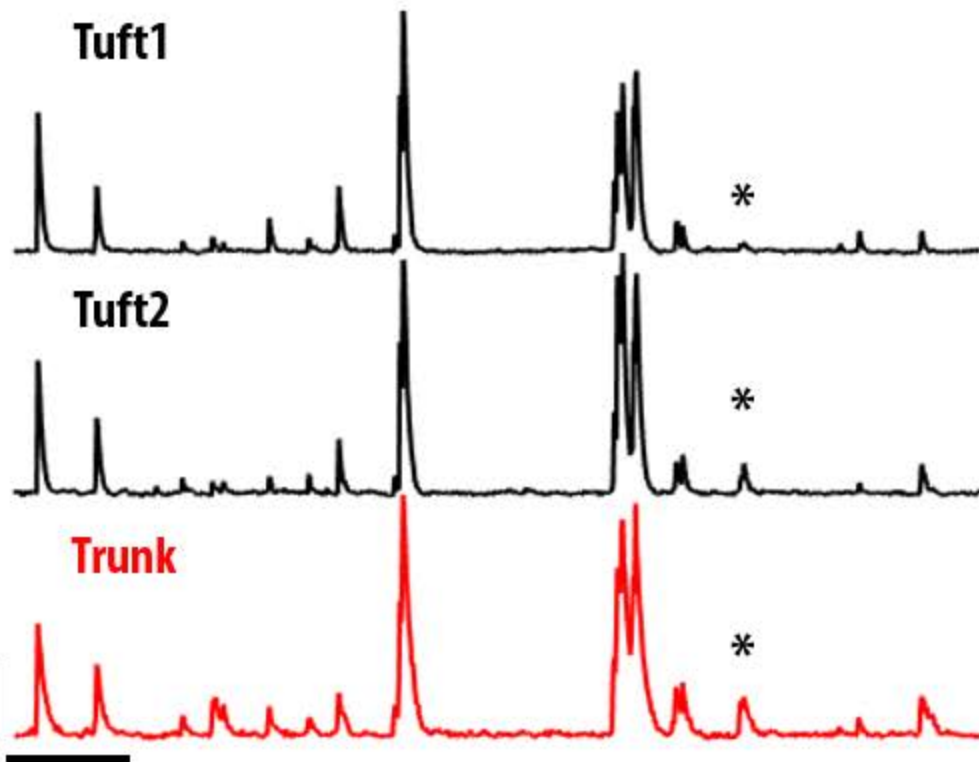**B**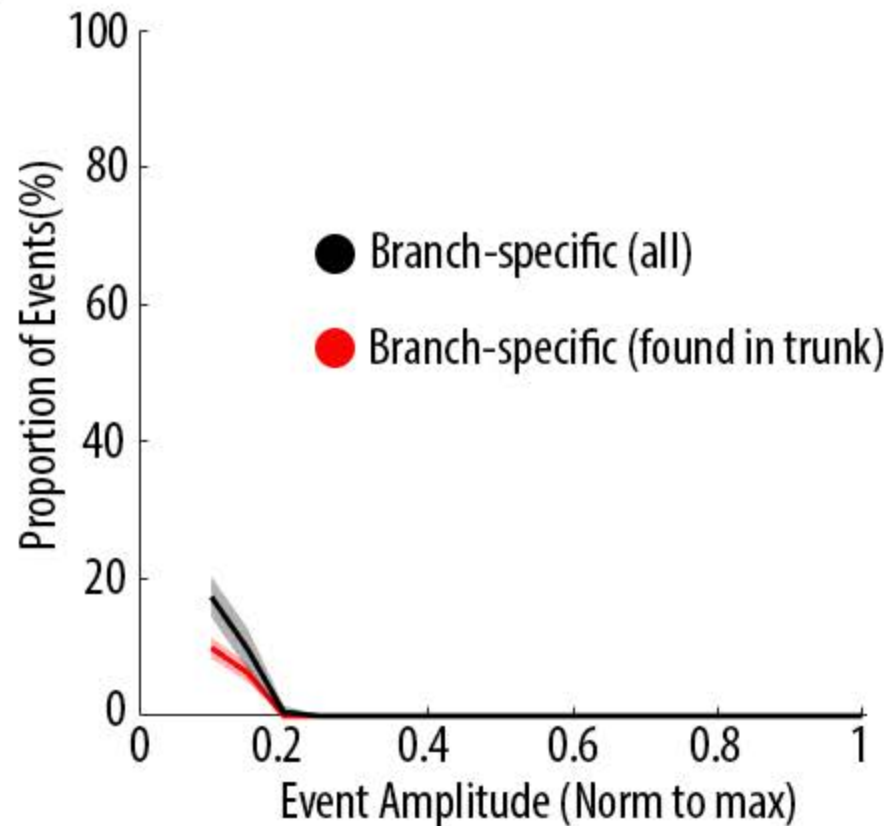

Supplement: supp [file elife-49145-supp-v1.zip]

**A**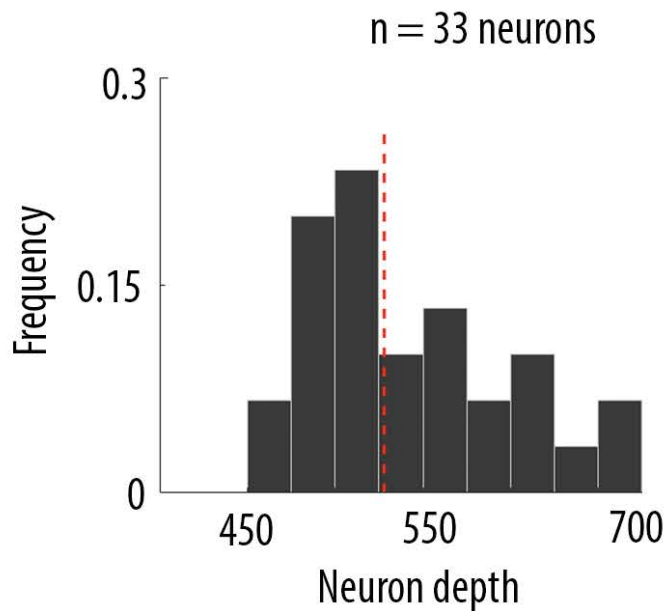**B**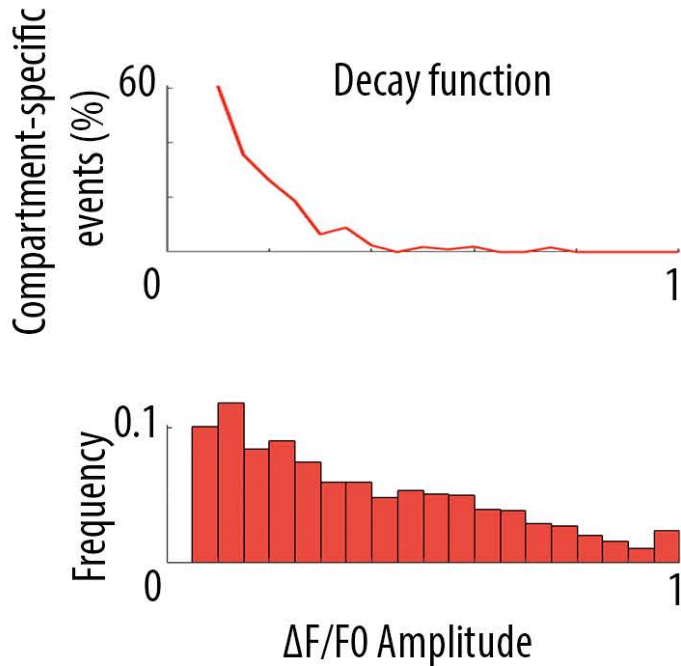**C**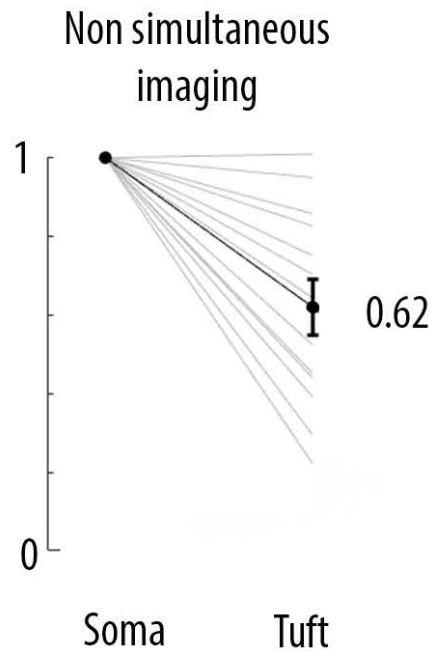

Supplement: supp [file elife-49145-supp-v1.zip]

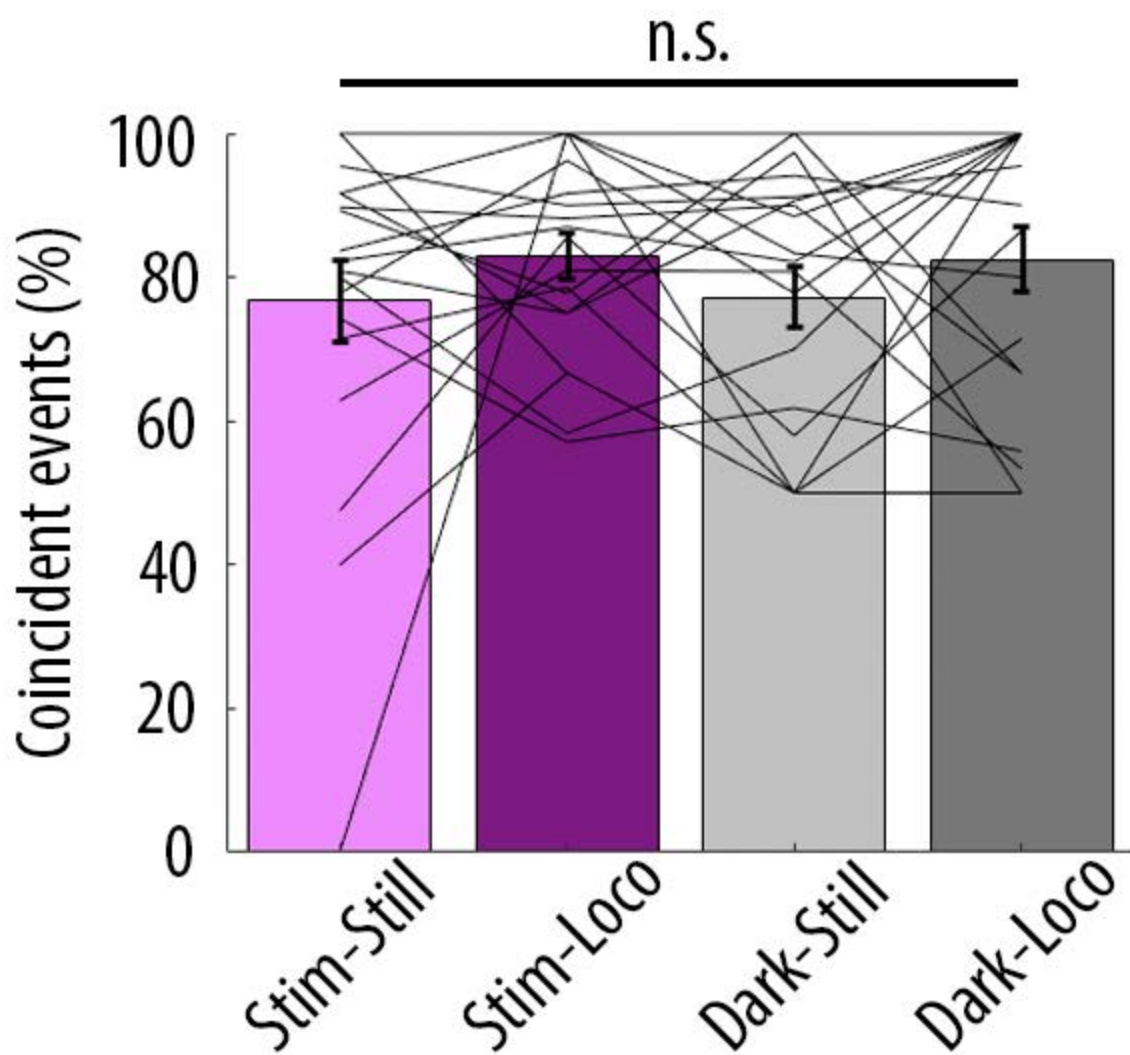

Supplement: supp [file elife-49145-supp-v1.zip]

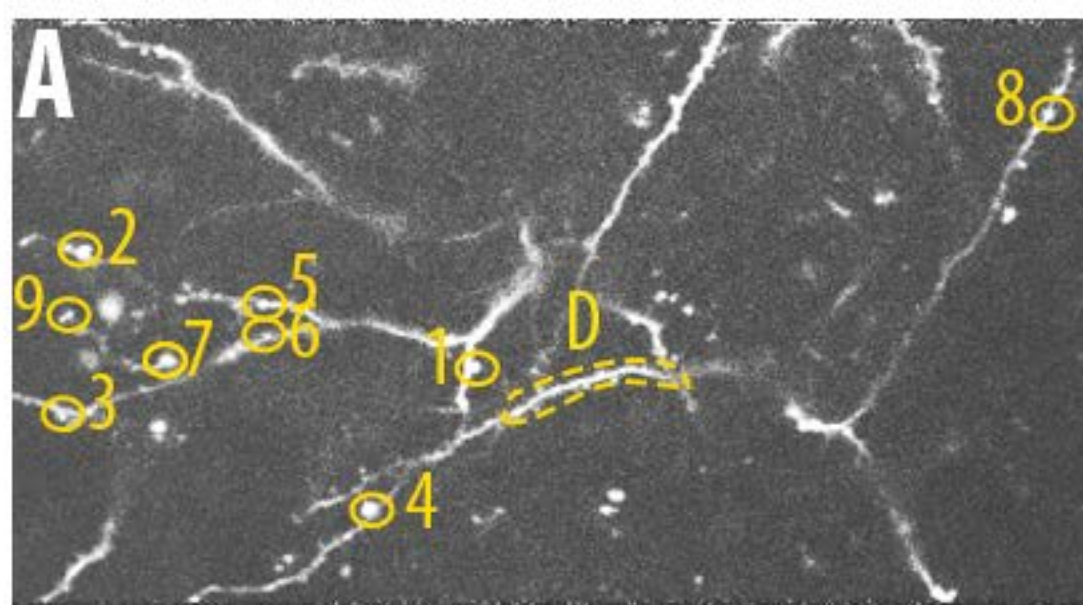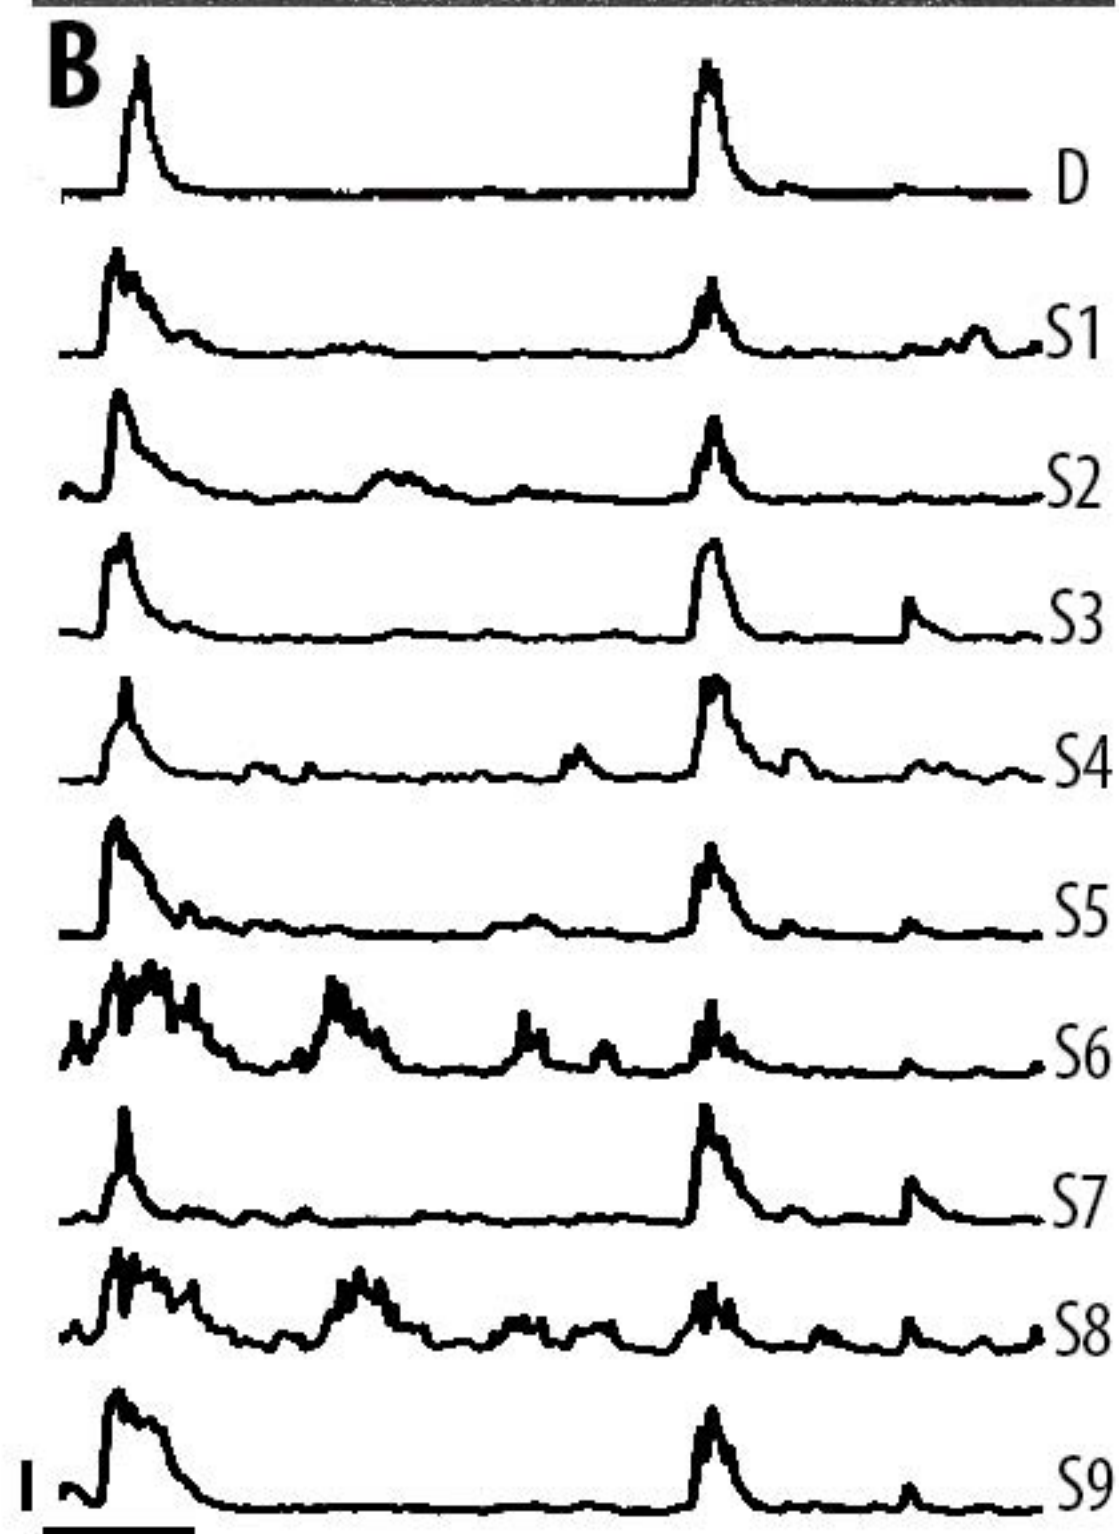

Supplement: supp [file elife-49145-supp-v1.zip]
